# Supplementary material for: LPS-induced inflammatory response is suppressed by Wnt inhibitors, Dickkopf-1 and LGK974
Source: PubMed Central journal article supplement (PMC5269682; doi:10.1038/srep41612), 2017-01-27
Supplement: srep41612-s1.pdf [file srep41612-s1.pdf]

**Supplementary Information of :**

**LPS-induced inflammatory response is suppressed by Wnt inhibitors, Dickkopf-1 and LGK974**

Jaewoong Jang<sup>1</sup>, Yoonju Jung<sup>1</sup>, Youngeun Kim<sup>2</sup>, Eek-hoon Jho<sup>2\*</sup>, Yoosik Yoon<sup>1\*</sup>

<sup>1</sup> Department of Microbiology, Chung-Ang University College of Medicine, Seoul 156-756, Republic of Korea

<sup>2</sup> Department of Life Science, University of Seoul, Seoul, 130-743, Republic of Korea

\* [ej70@uos.ac.kr](mailto:ej70@uos.ac.kr) (E-h. Jho) and [thanks@cau.ac.kr](mailto:thanks@cau.ac.kr) (Y. Yoon)

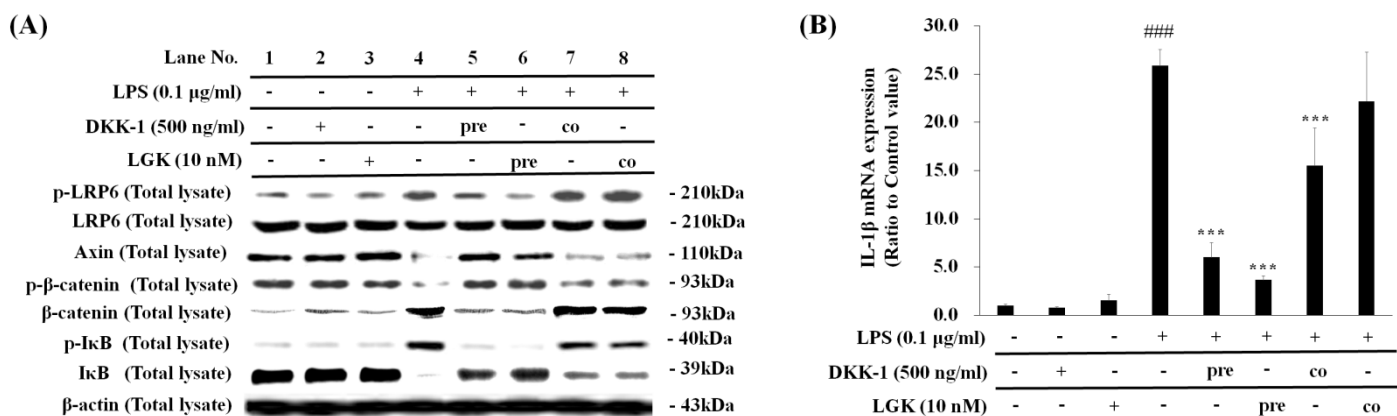

Supple Fig. 1. **Effects of DKK-1 and LGK974 alone and co-treatment with LPS on Wnt signaling and pro-inflammatory response.**

BEAS-2B human bronchial epithelial cells were treated with none (lane 1), DKK-1 alone (lane 2), LGK974 alone (lane 3), LPS alone (lane 4), LPS+DKK-1 pretreatment (lane 5), LPS+LGK974 pretreatment (lane 5), LPS+DKK-1 co-treatment (lane 7) and LPS+LGK974 co-treatment (lane 8). The protein levels of phospho-LRP6, total LRP6, Axin, phospho-β-catenin, total β-catenin, phospho-IκB and IκB were analyzed by Western blot (A). The mRNA expression of pro-inflammatory cytokine IL-1β were measured by realtime-qPCR (B). \* p<0.05, \*\* p<0.01, \*\*\* p<0.001 compared with cells treated with LPS alone. ### p<0.001 compared with cells treated with none.

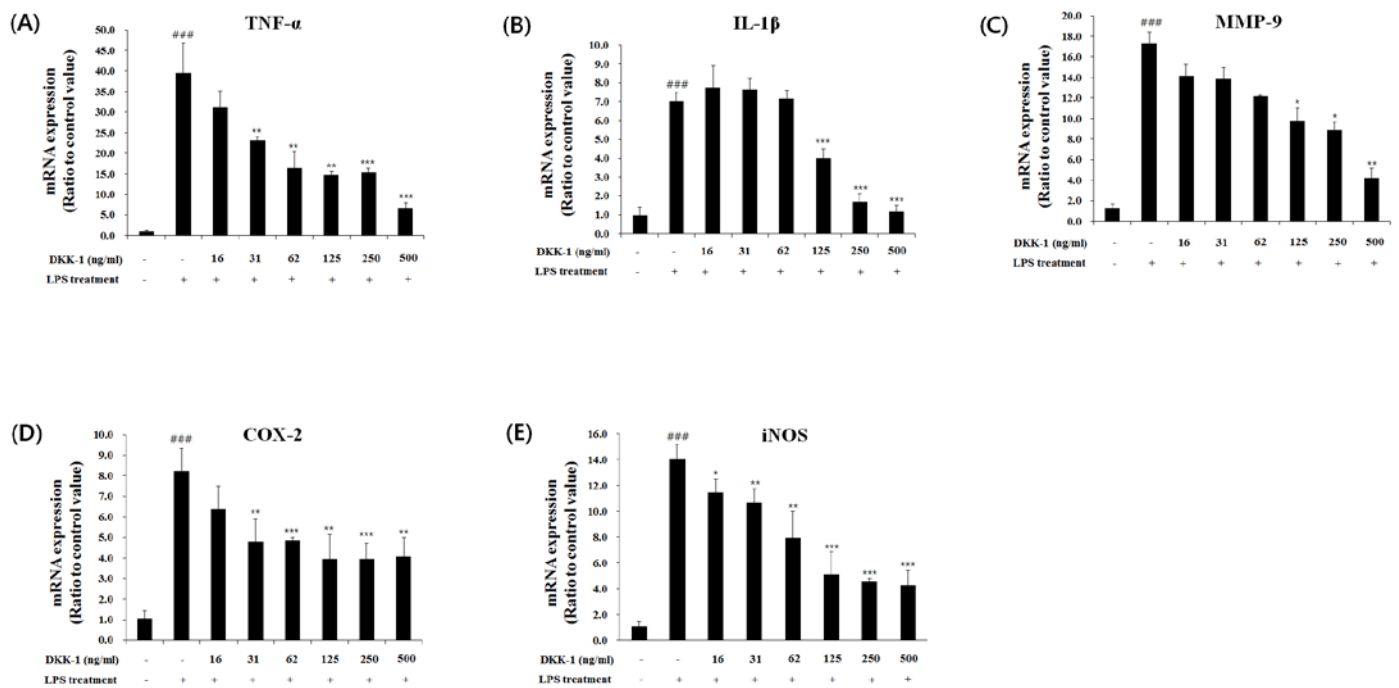

**Suppl Fig. 2 Suppressive effects of DKK-1 on pro-inflammatory gene expression.**

BEAS-2B human bronchial epithelial cells were pretreated with 16-500 ng/ml of recombinant DKK-1 for 24 hours, followed by 0.1  $\mu$ g/ml of LPS stimulation for 2 hours. The expression of pro-inflammatory genes including TNF- $\alpha$ , IL-1 $\beta$ , MMP-9, COX-2 and iNONS was measured by real time-qPCR. \* p<0.05, \*\* p<0.01, \*\*\* p<0.001 compared with LPS-stimulated cells without DKK-1 pretreatment. ### p<0.001 compared with cells without LPS stimulation.

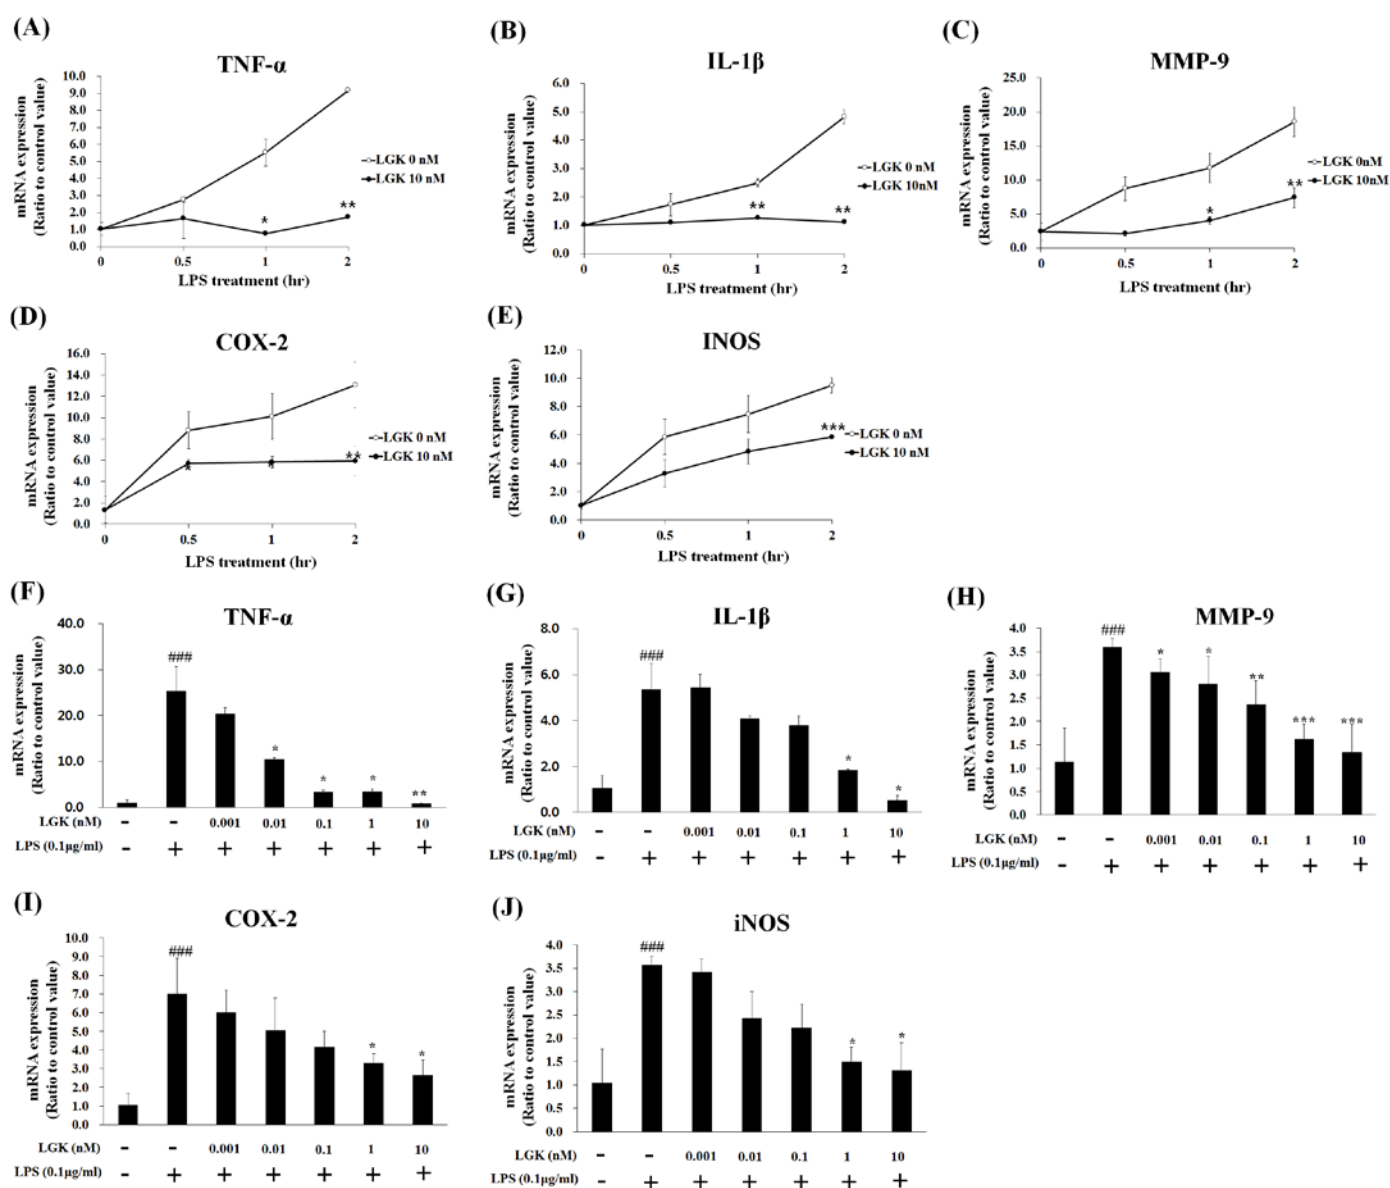

**Suppl Fig. 3 Suppressive effects of LGK-974 on pro-inflammatory gene expression.**

(A-E) BEAS-2B human bronchial epithelial cells were pretreated with 10 nM LGK974 for 2 hours, followed by 0.1  $\mu$ g/ml LPS stimulation for various time periods of 0.25–2 hours. The expression of pro-inflammatory genes including TNF- $\alpha$ , IL-1 $\beta$ , MMP-9, COX-2 and iNONS was measured by real time-qPCR. \*  $p < 0.05$ , \*\*  $p < 0.01$ , \*\*\*  $p < 0.001$  compared with LPS-stimulated cells without LGK974 pretreatment at the same treatment hour.

(F-J) Cells were pretreated with 0.001 - 10 nM of LGK974 for 2 hours, followed by 0.1  $\mu$ g/ml of LPS stimulation for 2 hours. The expression of pro-inflammatory genes was measured by real time-qPCR. \*  $p < 0.05$ , \*\*  $p < 0.01$ , \*\*\*  $p < 0.001$  compared with LPS-stimulated cells without LGK974 pretreatment. ###  $p < 0.001$  compared with cells without LPS stimulation.

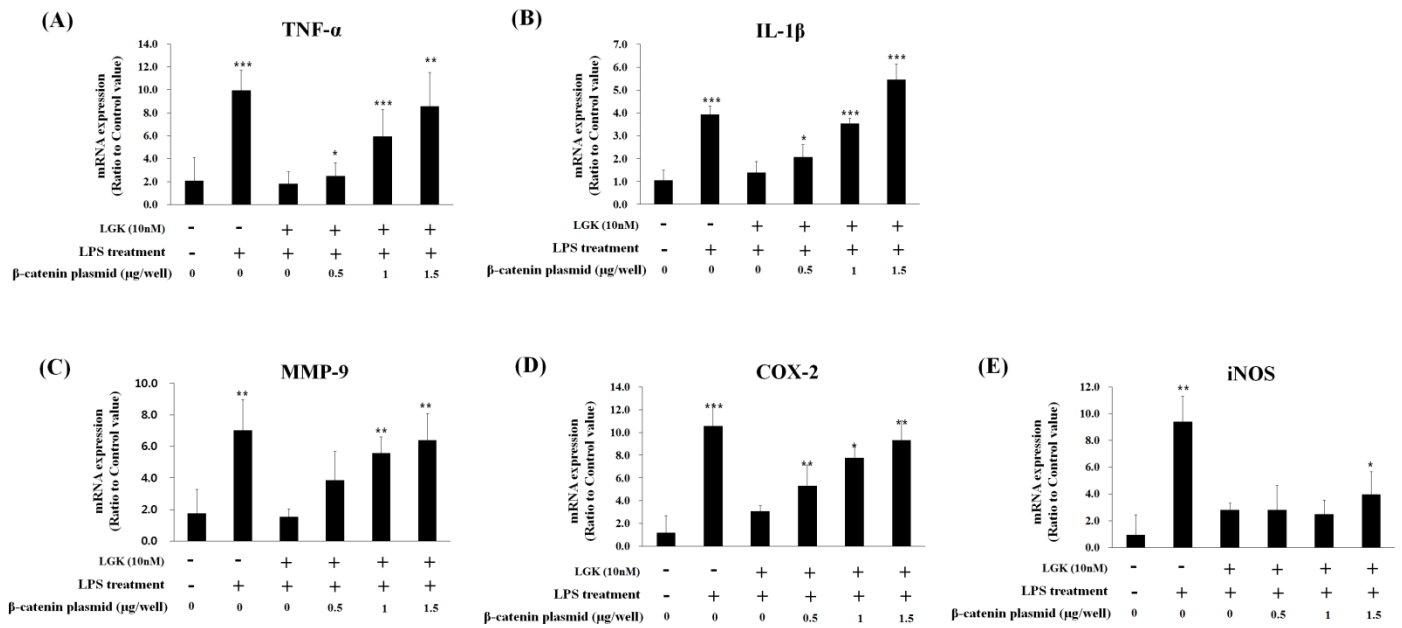

**Suppl Fig. 4 Rescuing effects of  $\beta$ -catenin expression on pro-inflammatory gene expression suppressed by LGK974.**

BEAS-2B human bronchial epithelial cells were transfected with 0.5 to 1.5  $\mu$ g/well of  $\beta$ -catenin expression plasmid one day before pretreatment with 10 nM LGK974 for 2 hours, followed by 0.1  $\mu$ g/ml LPS stimulation for 2 hours. The expression of pro-inflammatory genes including TNF- $\alpha$ , IL-1 $\beta$ , MMP-9, COX-2 and iNONS was measured by real time-qPCR. Data were compared to those of cells transfected with 0  $\mu$ g of  $\beta$ -catenin plasmid with LGK974 and LPS treatment (#-marked column). \*  $p < 0.05$ , \*\*  $p < 0.01$ , \*\*\*  $p < 0.001$
